# Supplementary material for: Analysis of Urine Drug Test Results From Substance Use Disorder Treatment Practices and Overdose Mortality Rates, 2013-2020
Source: PubMed Central journal article supplement — JAMA Netw Open. 2022 Jun 3;5(6):e2215425. doi: 10.1001/jamanetworkopen.2022.15425 (PMC9166618; doi:10.1001/jamanetworkopen.2022.15425), 2022-06-03
Supplement: jamanetwopen-e2215425-s001.pdf [file jamanetwopen-e2215425-s001.pdf]

## Supplementary Online Content

Whitley P, LaRue L, Fernandez S, Passik SD, Dawson E, Jackson RD. Analysis of urine drug test results from substance use disorder treatment practices and overdose mortality rates, 2013-2020. *JAMA Netw Open*. 2022;5(6):e2215425. doi:10.1001/jamanetworkopen.2022.15425

**eTable 1.** National-, State-, and County-Level Overdose Mortality Estimates Used in the Current Study

**eTable 2.** Yearly US Urine Drug Test Positivity Rates Stratified by Presence of Synthetic Opioids

**eTable 3.** Spearman Correlation for Yearly State-Level Overdose Mortality Rates With Corresponding Urine Drug Test Positivity Rates

**eTable 4.** Spearman Correlation for Yearly Urine Drug Test Positivity Rate vs Overdose Mortality Rate for Select States

**eTable 5.** Spearman Correlation for Yearly Urine Drug Test Positivity Rate vs Mortality Rate for Select Ohio Counties

This supplementary material has been provided by the authors to give readers additional information about their work.

**eTable 1.** National, State, and County-Level Overdose Mortality Estimates Used in the Current Study

| Overdose Mortality Deaths/Rates              | Underlying Cause of Death (UCD) <sup>a</sup> | Multiple Cause of Death (MCD) <sup>b</sup> | Synthetic Opioid Status | Stratification                                  | Study Purpose     |
|----------------------------------------------|----------------------------------------------|--------------------------------------------|-------------------------|-------------------------------------------------|-------------------|
| National Monthly MCD                         | ALL                                          | ALL                                        |                         | Group By: Month; Multiple Cause of death        | Correlation       |
| National Monthly MCD Plus Synthetic Opioids  | ALL                                          | ALL                                        | and T40.4               | Group By: Month; Multiple Cause of death        | Correlation       |
| National Monthly MCD Minus Synthetic Opioids | ALL                                          | ALL                                        | not T40.4               | Group By: Month; Multiple Cause of death        | Correlation       |
| State Yearly MCD                             | ALL                                          | ALL                                        |                         | Group By: State; Year; Multiple Cause of death  | Correlation       |
| State Yearly MCD Plus Synthetic Opioids      | ALL                                          | ALL                                        | and T40.4               | Group By: State; Year; Multiple Cause of death  | Correlation       |
| State Yearly MCD Minus Synthetic Opioids     | ALL                                          | ALL                                        | not T40.4               | Group By: State; Year; Multiple Cause of death  | Correlation       |
| State Monthly Total                          | ALL                                          | ALL                                        |                         | Group By: State; Month                          | Regression models |
| Ohio County Yearly MCD                       | ALL                                          |                                            |                         | Group By: County; Year; Multiple Cause of death | Correlation       |
| Ohio County Quarterly Total                  | ALL                                          |                                            |                         | Group By: County; Month (summed to quarter)     | Regression models |

a. All overdose mortality measures include at least one of the following Underlying Cause of Death (UCD) ICD-10 Codes: Drug poisonings (overdose) Unintentional (X40-X44); Drug poisonings (overdose) Suicide (X60-X64); Drug poisonings (overdose) Homicide (X85); Drug poisonings (overdose) Undetermined (Y10-Y14)

b. Overdose mortality measures include at least one of the following Multiple Cause of Death (MCD) ICD-10 Codes: T40.1 (Heroin); T40.2 (Other Opioids); T40.4 (Synthetic Opioids); T40.5 (Cocaine); T43.6 (Methamphetamine)

**eTable 2.** Yearly US Urine Drug Test Positivity Rates Stratified by Presence of Synthetic Opioids

| Drug Category     | Rate Type               | 2013, No. (%) | 2014, No. (%) | 2015, No. (%) | 2016, No. (%) | 2017, No. (%) | 2018, No. (%) | 2019, No. (%) | 2020, No. (%) |
|-------------------|-------------------------|---------------|---------------|---------------|---------------|---------------|---------------|---------------|---------------|
| Synthetic Opioids | Total                   | 1,241 (2.1)   | 2,591 (3.7)   | 5,287 (5.9)   | 4,789 (7.2)   | 4,337 (8.5)   | 4,940 (9.5)   | 7,633 (13.1)  | 10,449 (19.1) |
| Methamphetamine   | Total                   | 1,259 (2.2)   | 2,690 (3.8)   | 6,263 (7.0)   | 7,626 (11.5)  | 7,664 (15.0)  | 8,463 (16.3)  | 9,897 (16.9)  | 11,465 (21.0) |
| Methamphetamine   | Plus Synthetic Opioids  | 33 (0.1)      | 97 (0.1)      | 363 (0.4)     | 714 (1.1)     | 927 (1.8)     | 1,399 (2.7)   | 2,314 (4.0)   | 4,307 (7.9)   |
| Methamphetamine   | Minus Synthetic Opioids | 1,226 (2.1)   | 2,593 (3.7)   | 5,900 (6.6)   | 6,912 (10.4)  | 6,737 (13.2)  | 7,064 (13.6)  | 7,583 (13.0)  | 7,158 (13.1)  |
| Cocaine           | Total                   | 4,602 (7.9)   | 7,678 (11.0)  | 9,168 (10.2)  | 5,975 (9.0)   | 4,889 (9.6)   | 4,808 (9.3)   | 6,344 (10.9)  | 5,389 (9.9)   |
| Cocaine           | Plus Synthetic Opioids  | 163 (0.3)     | 604 (0.9)     | 1,559 (1.7)   | 1,506 (2.3)   | 1,544 (3.0)   | 1,723 (3.3)   | 2,863 (4.9)   | 2,796 (5.1)   |
| Cocaine           | Minus Synthetic Opioids | 4,439 (7.7)   | 7,074 (10.1)  | 7,609 (8.5)   | 4,469 (6.7)   | 3,345 (6.5)   | 3,085 (6.0)   | 3,481 (6.0)   | 2,593 (4.7)   |
| Heroin            | Total                   | 2,337 (4.0)   | 4,410 (6.3)   | 6,288 (7.0)   | 3,677 (5.5)   | 2,484 (4.9)   | 2,809 (5.4)   | 2,680 (4.6)   | 2,593 (4.7)   |
| Heroin            | Plus Synthetic Opioids  | 65 (0.1)      | 530 (0.8)     | 1,559 (1.7)   | 1,329 (2.0)   | 1,152 (2.3)   | 1,263 (2.4)   | 1,504 (2.6)   | 1,694 (3.1)   |
| Heroin            | Minus Synthetic Opioids | 2,272 (3.9)   | 3,880 (5.5)   | 4,729 (5.3)   | 2,348 (3.5)   | 1,332 (2.6)   | 1,546 (3.0)   | 1,176 (2.0)   | 899 (1.6)     |
| Other Opioids     | Total                   | 12,513 (21.6) | 17,662 (25.2) | 23,685 (26.5) | 14,706 (22.2) | 9,878 (19.3)  | 9,150 (17.7)  | 9,569 (16.4)  | 8,803 (16.1)  |
| Other Opioids     | Plus Synthetic Opioids  | 614 (1.1)     | 1,630 (2.3)   | 3,914 (4.4)   | 3,445 (5.2)   | 3,087 (6.0)   | 3,278 (6.3)   | 4,569 (7.8)   | 5,054 (9.2)   |
| Other Opioids     | Minus Synthetic Opioids | 11,899 (20.5) | 16,032 (22.9) | 19,771 (22.1) | 11,261 (17.0) | 6,791 (13.3)  | 5,872 (11.3)  | 5,000 (8.6)   | 3,749 (6.9)   |

Yearly UDT positives (No.) and positivity rates (%) calculated for the 5 drug classes and stratified by co-detection of synthetic opioids. Total positivity rate is not stratified by detection of synthetic opioids. Positivity rate is calculated as the number of positives (or co-positives) divided by the total number of samples times 100. Synthetic opioids can only be estimated for the total positivity rate.

**eTable 3.** Spearman Correlation for Yearly State-Level (n = 24) Overdose Mortality Rates With Corresponding Urine Drug Test Positivity Rates

| Year   | Rate                    | Synthetic Opioids | Methamphetamine | Cocaine | Heroin | Other Opioids |
|--------|-------------------------|-------------------|-----------------|---------|--------|---------------|
| 2013   | Total                   | 0.14              | 0.80            | 0.57    | 0.54   | 0.04          |
| 2014   | Total                   | 0.65              | 0.80            | 0.68    | 0.63   | 0.25          |
| 2015   | Total                   | 0.61              | 0.85            | 0.77    | 0.66   | 0.31          |
| 2016   | Total                   | 0.80              | 0.85            | 0.83    | 0.61   | 0.51          |
| 2017   | Total                   | 0.77              | 0.71            | 0.75    | 0.42   | 0.38          |
| 2018   | Total                   | 0.80              | 0.73            | 0.69    | 0.11   | 0.31          |
| 2019   | Total                   | 0.80              | 0.68            | 0.73    | 0.09   | 0.30          |
| Median | Total                   | 0.77              | 0.80            | 0.73    | 0.54   | 0.31          |
| 2013   | Minus Synthetic Opioids | NA                | 0.79            | 0.52    | 0.54   | -0.03         |
| 2014   | Minus Synthetic Opioids | NA                | 0.82            | 0.67    | 0.64   | 0.23          |
| 2015   | Minus Synthetic Opioids | NA                | 0.82            | 0.74    | 0.63   | 0.27          |
| 2016   | Minus Synthetic Opioids | NA                | 0.86            | 0.70    | 0.62   | 0.35          |
| 2017   | Minus Synthetic Opioids | NA                | 0.78            | 0.54    | 0.42   | 0.12          |
| 2018   | Minus Synthetic Opioids | NA                | 0.75            | 0.51    | 0.43   | 0.17          |
| 2019   | Minus Synthetic Opioids | NA                | 0.70            | 0.59    | 0.78   | 0.33          |
| Median | Minus Synthetic Opioids | NA                | 0.79            | 0.59    | 0.62   | 0.23          |
| 2013   | Plus Synthetic Opioids  | NA                | -0.11           | 0.38    | 0.49   | 0.20          |
| 2014   | Plus Synthetic Opioids  | NA                | -0.05           | 0.81    | 0.86   | 0.64          |
| 2015   | Plus Synthetic Opioids  | NA                | 0.08            | 0.78    | 0.86   | 0.63          |
| 2016   | Plus Synthetic Opioids  | NA                | 0.42            | 0.89    | 0.86   | 0.81          |
| 2017   | Plus Synthetic Opioids  | NA                | 0.46            | 0.81    | 0.79   | 0.76          |
| 2018   | Plus Synthetic Opioids  | NA                | 0.62            | 0.86    | 0.68   | 0.76          |
| 2019   | Plus Synthetic Opioids  | NA                | 0.80            | 0.69    | 0.50   | 0.65          |
| Median | Plus Synthetic Opioids  | NA                | 0.42            | 0.81    | 0.79   | 0.65          |

Spearman correlation for state level mortality and UDT positivity rates stratified by drug category, year of collection and synthetic opioid co-detection. Each correlation represents the state level mortality and UDT positivity rate correlation for a given year. The mortality rates and the UDT positivity rates have been standardized (mean=0, sd=1).

**eTable 4.** Spearman Correlation for Yearly Urine Drug Test Positivity Rate vs Overdose Mortality Rate for Select States

| State          | Synthetic Opioids | Methamphetamine | Cocaine  | Heroin   | Other Opioids |
|----------------|-------------------|-----------------|----------|----------|---------------|
| Arizona        | 0.96 **           | 0.64            | 0.43     | 0.39     | 0.64          |
| California     | 0.57              | 0.89 *          | -0.21    | -0.54    | 0.54          |
| Florida        | 0.96 **           | 0.96 **         | 0.43     | 0.39     | 0.25          |
| Georgia        | -0.04             | 0.96 **         | 0.68     | -0.64    | -0.07         |
| Indiana        | 0.93 **           | 0.96 **         | 0.39     | 0.21     | -0.71         |
| Kentucky       | 0.86 *            | 1.00 ***        | 0.71     | 0.71     | 0.50          |
| Louisiana      | 0.14              | 0.36            | -0.46    | -0.11    | -0.57         |
| Maryland       | 0.96 **           | 0.89 *          | 0.89 *   | 0.57     | 0.39          |
| Michigan       | -0.36             | 0.96 **         | 0.54     | 0.04     | -0.46         |
| Minnesota      | 0.82 *            | 0.89 *          | 0.89 *   | 0.25     | 0.04          |
| Mississippi    | 0.86 *            | 0.89 *          | 0.32     | 0.89 *   | 0.14          |
| Nevada         | -0.50             | -0.57           | -0.04    | -0.96 ** | 0.68          |
| New York       | 0.36              | 0.93 **         | -0.93 ** | -0.54    | -0.46         |
| North Carolina | 0.64              | 0.86 *          | 0.96 **  | 0.64     | 0.46          |
| Ohio           | 0.93 **           | 1.00 ***        | 0.96 **  | 0.82 *   | 0.46          |
| Oklahoma       | 0.18              | 0.93 **         | -0.23    | 0.18     | 0.14          |
| Oregon         | 0.57              | 1.00 ***        | 0.64     | 0.64     | -0.61         |
| Pennsylvania   | 0.96 **           | 1.00 ***        | 0.32     | -0.21    | -0.21         |
| Tennessee      | 0.96 **           | 0.93 **         | 0.25     | 0.43     | 0.21          |
| Texas          | 0.32              | 0.86 *          | 0.82 *   | 0.79 *   | 0.39          |
| Utah           | 0.18              | 0.82 *          | 0.36     | 0.71     | -0.14         |
| Virginia       | 0.93 **           | 0.57            | 0.89 *   | -0.39    | 0.57          |
| Washington     | 0.93 **           | 0.96 **         | -0.18    | 0.36     | -0.43         |
| Wisconsin      | 0.79 *            | 0.86 *          | 0.75     | 0.29     | 0.46          |
| Median         | 0.80              | 0.91            | 0.43     | 0.32     | 0.18          |

Spearman correlation for yearly state level mortality and UDT positivity rates stratified by drug category.  
*P* value designation \* <0.05, \*\* <0.01, \*\*\* <0.001

**eTable 5.** Spearman Correlation for Yearly Urine Drug Test Positivity Rate vs Mortality Rate for Select Ohio Counties

| County    | Synthetic Opioids | Methamphetamine | Cocaine | Heroin   | Other Opioids |
|-----------|-------------------|-----------------|---------|----------|---------------|
| Franklin  | 0.95 **           | 0.95 **         | 0.40    | 0.81 *   | -0.07         |
| Cuyahoga  | 0.71              | 0.69            | 0.48    | 0.79 *   | 0.81 *        |
| Hamilton  | 0.62              | 0.67            | 0.00    | 0.43     | 0.17          |
| Summit    | 0.88 **           | 0.88 **         | 0.40    | 0.98 *** | 0.55          |
| Lucas     | 0.98 ***          | 0.54            | 0.71    | 0.67     | 0.74 *        |
| Butler    | 0.43              | 0.74 *          | 0.19    | 0.97 *** | 0.40          |
| Lorain    | 0.93 **           | 0.55            | 0.60    | 0.38     | -0.45         |
| Warren    | 0.48              | 0.36            | 0.38    | 0.84 **  | -0.14         |
| Clermont  | 0.21              | 0.38            | 0.12    | 0.79 *   | 0.60          |
| Medina    | 0.81 *            | 0.32            | 0.76 *  | 0.69     | 0.17          |
| Fairfield | 0.89 **           | 0.83 *          | 0.20    | -0.07    | -0.07         |
| Wood      | 0.71              | -0.05           | -0.43   | 0.69     | 0.57          |
| Richland  | 0.83 *            | 0.94 ***        | 0.24    | 0.69     | 0.17          |
| Allen     | 0.62              | 0.83 **         | -0.04   | 0.79 *   | 0.74 *        |
| Erie      | 0.62              | 0.83 **         | 0.67    | 0.21     | 0.43          |
| Marion    | 0.90 **           | 0.79 *          | -0.48   | 0.55     | 0.36          |
| Huron     | 0.74 *            | 0.34            | 0.50    | -0.08    | 0.26          |
| Seneca    | 0.60              | 0.59            | -0.05   | 0.24     | 0.34          |
| Fulton    | 0.55              | 0.67            | 0.06    | -0.38    | -0.12         |
| Median    | 0.71              | 0.67            | 0.24    | 0.69     | 0.34          |

Spearman correlation for yearly county level mortality and UDT positivity rates stratified by drug category.  
P value designation \* <0.05, \*\* <0.01, \*\*\* <0.001
